# Supplementary material
Source: PubMed Central journal article supplement (PMC5751895)
Supplement: NIHMS74400-supplement-Supplementary_Table_1.pdf [file NIHMS74400-supplement-Supplementary_Table_1.pdf]

**Supplementary table 1**

| <b>Name</b>             | <b>5' -&gt; 3' forward</b> | <b>5' -&gt; 3' reverse</b> |
|-------------------------|----------------------------|----------------------------|
| <i>β-Actin (ACTB)</i>   | CTATCCAGGCTGTGCTATCCCTGT   | CCTTAATGTCACGCACGATTTC     |
| <i>COL12A1</i>          | CGCCGCTACCTCTCCCTGTTG      | AGACACTCCATCCCTTCTGCCTCA   |
| <i>EDEM1</i>            | GGCCACGATAAGGGTCCTGGG      | AAAAGCAGGGAGGAGCCGCA       |
| <i>EMP1</i>             | TGCCCTCAAGACAGTGCAGGC      | ATGCACAGCCAGCACACCAGT      |
| <i>IL-8 (CXCL8)</i>     | AAGCTGGCCGTGGCTCTTTG       | CTGCACCCAGTTTTCTTGGGGT     |
| <i>LOX</i>              | GCCCCTCCTGCTTCTTTTACA      | GGCGCAGCAGTGAAACAACCC      |
| <i>LOXL2</i>            | GAGGCGGTGCCTACATCGGG       | CCGATCCCTTGCCCCAGTCG       |
| <i>NT5E</i>             | GGTGGTATCCGGTCGCCATT       | TGGACTGGCCGTAGCGGTG        |
| <i>PAI-1 (SERPINE1)</i> | CCAGAGCAGGACGAACCGCC       | ACGTTGCGGTCTTGGAGGC        |
| <i>PLAUR (uPAR)</i>     | GAGCCAGCCCTTACCACC         | CGGGGTCCCTGCACGTCTTC       |
| <i>RPN1</i>             | GCTCTTCCCGGTCATGGAGGC      | CTGGCCGTCACCTTAGCCAG       |
| <i>SNAIL2 (SNAI2)</i>   | CAGACCCGCTGGCAAGATGC       | ATTGGGTAGCTGGGCGTGGAA      |
| <i>SR-BI (SCARB1)</i>   | GTACGTCCTCCTGGCGCTGG       | GCAGCACAGAGCCCTTGGGA       |
| <i>STAT5a</i>           | AGACGGTCCCTCCCTGGACTT      | CGGGTCAGAATAGCCGGGGG       |
| <i>STAT5b</i>           | GCAGCTCCAAGGAGAAGCCCT      | CCACCTGGTGCTCTGCCTTCT      |
| <i>VEGFA</i>            | CACGAAGTGGTGAAGTTCATGGAT   | AATCTGCATGGTGATGTTGGACTC   |
