# Supplementary material
Source: PubMed Central journal article supplement (PMC5751895)
Supplement: NIHMS74400-supplement-Supplementary_Table_2.pdf [file NIHMS74400-supplement-Supplementary_Table_2.pdf]

**Supplementary table 2**

| <b>Antibody</b>              | <b>Company</b>               | <b>Cat.No.</b> | <b>IHC/ICC/IF</b>          | <b>WB</b> |
|------------------------------|------------------------------|----------------|----------------------------|-----------|
| $\alpha$ -tubulin            | Calbiochem                   | CP06           |                            | 1:5000    |
| $\beta$ -Actin               | Santa Cruz                   | sc-47778       |                            | 1:1500    |
| CTD110.6                     | COVANCE                      | MMS-248R       |                            | 1:1000    |
| E-Cadherin                   | BD Transduction Laboratories | 610182         | 1:600                      | 1:10000   |
| GAPDH XP®                    | Cell Signaling               | 5174S          | 1:800                      | 1:5000    |
| pAkt (S473)                  | Cell Signaling               | #4060S         | 1:50                       | 1:2000    |
| pS6 (Ser240/244)             | Cell Signaling               | #2215S         | 1:600                      | 1:10000   |
| pY-STAT5 (Tyr694)            | Cell Signaling               | #9314          | 1:400                      | 1:2000    |
| SR-BI                        | BD Transduction Laboratories | 610882         | 1:500                      | 1:2000    |
| STAT5 total                  | BD Transduction Laboratories | 610191         | 1:400<br>1:200 <b>(IF)</b> | 1:1500    |
| VEGFA <b>(ICC)</b>           | R&D Systems                  | MAB293         | 1:300 <b>(ICC)</b>         |           |
| WGA <b>(IF)</b>              | Thermo Fisher Scientific     | MP 00831       | 1:200                      |           |
| Biotinylated anti-rabbit     | Vector Laboratories          | BA-1100        | 1:500                      |           |
| Biotinylated anti-mouse      | Vector Laboratories          | BA-2000        | 1:500                      |           |
| Peroxidase conj. anti-rabbit | Thermo Scientific            | 31460          |                            | 1:5000    |
| Peroxidase conj. anti-mouse  | Thermo Scientific            | 31430          |                            | 1:5000    |
| Alexa488 anti-mouse          | Abcam                        | ab150105       | 1:1000 <b>(IF)</b>         |           |
