# Supplementary material
Source: PubMed Central journal article supplement (PMC5751895)

A

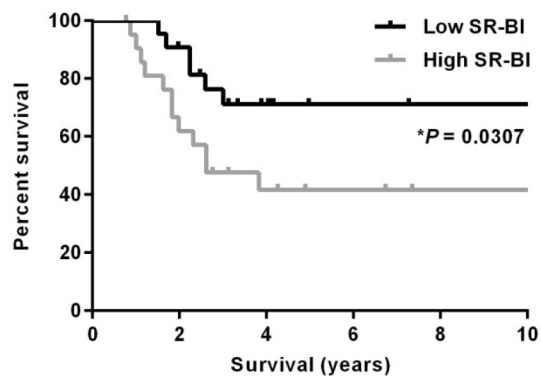

B

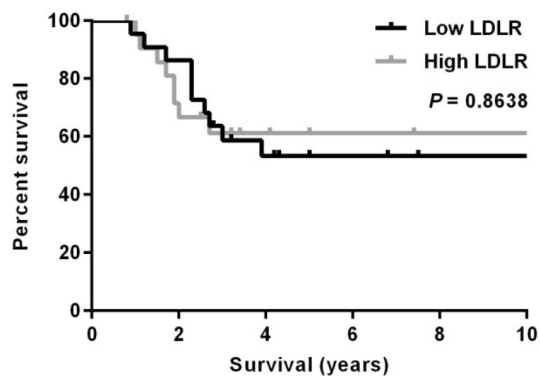

C

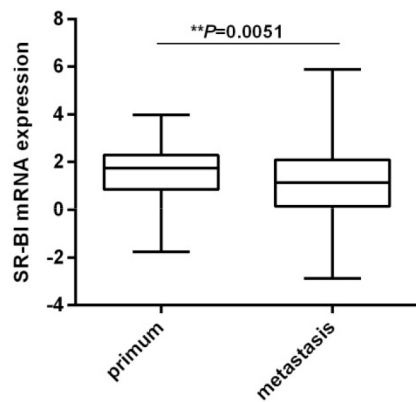

D

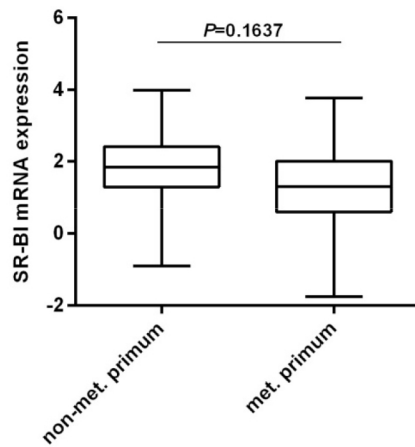

E

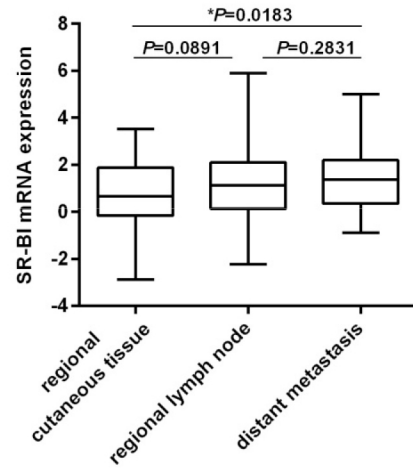

Supplement: NIHMS74400-supplement-Supplementary_Figure_1.pdf [file NIHMS74400-supplement-Supplementary_Figure_1.pdf]

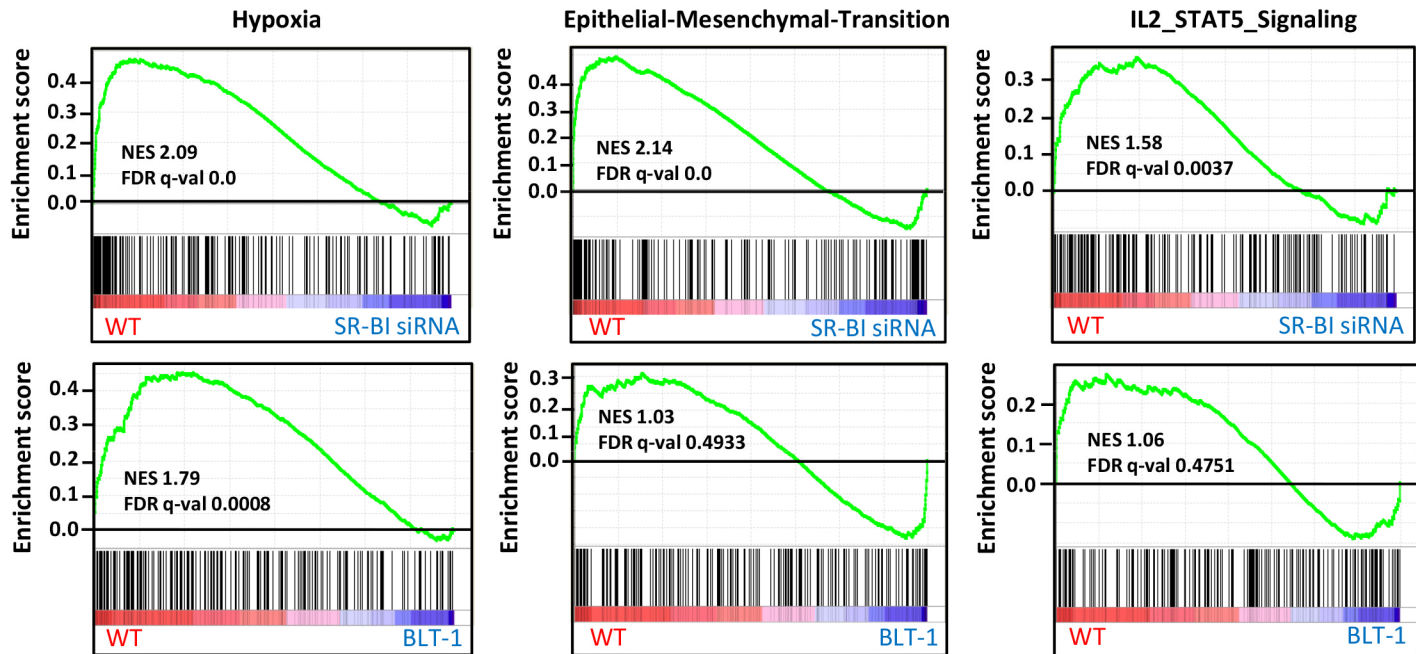

Supplement: NIHMS74400-supplement-Supplementary_Figure_2.pdf [file NIHMS74400-supplement-Supplementary_Figure_2.pdf]

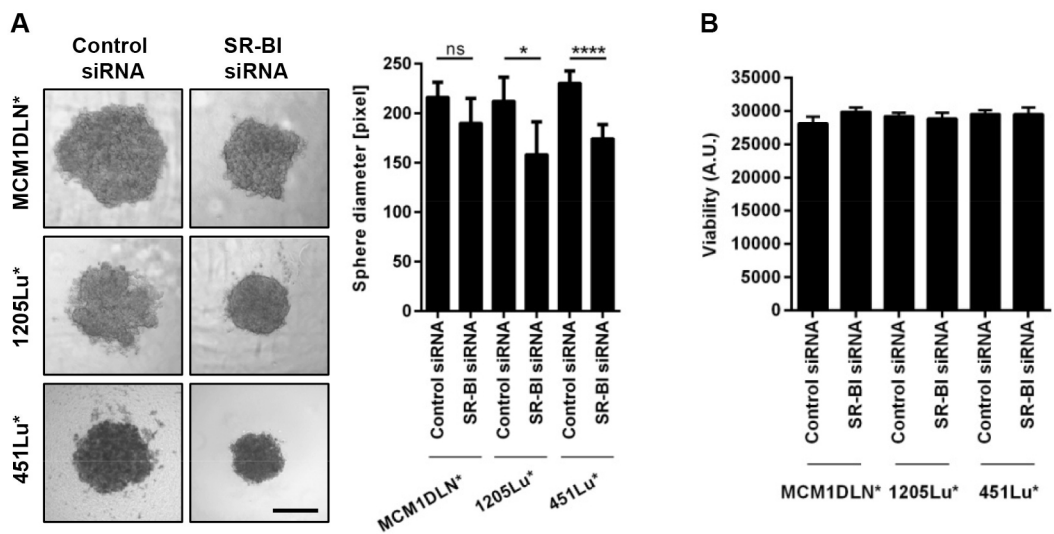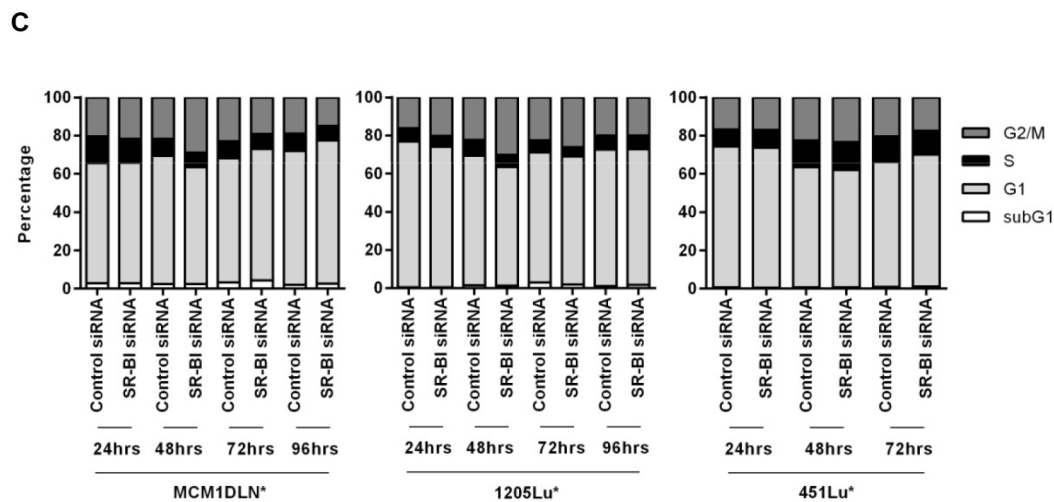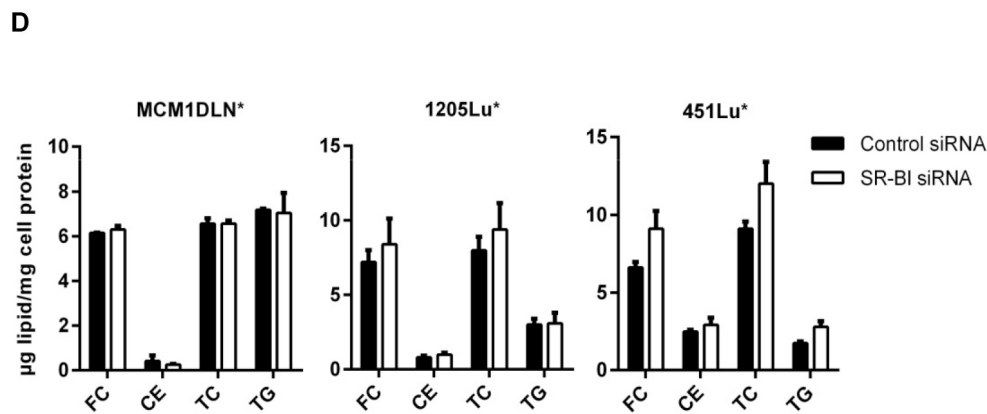

Supplement: NIHMS74400-supplement-Supplementary_Figure_3.pdf [file NIHMS74400-supplement-Supplementary_Figure_3.pdf]

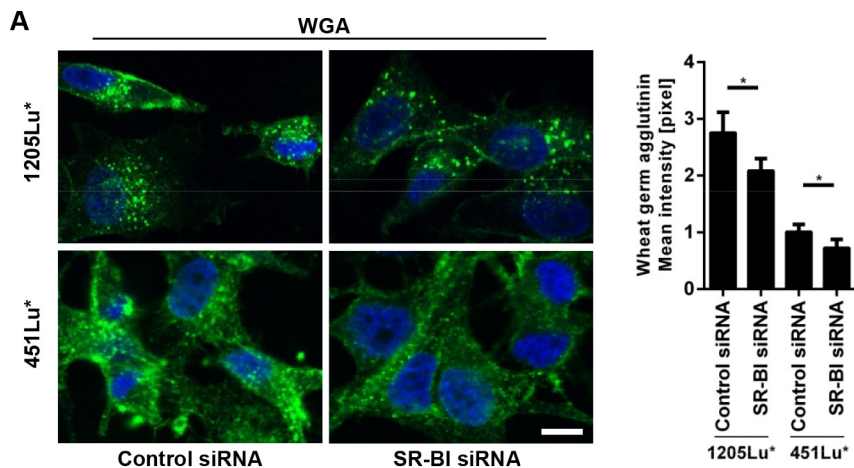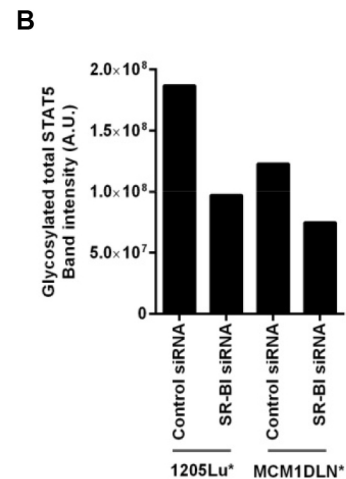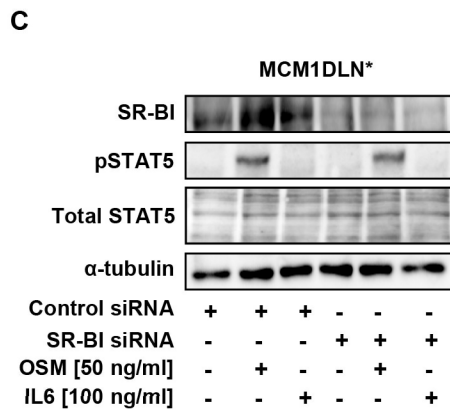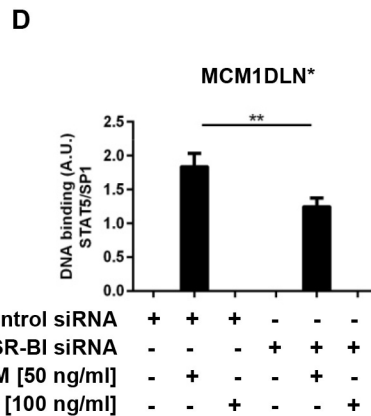

Supplement: NIHMS74400-supplement-Supplementary_Figure_4.pdf [file NIHMS74400-supplement-Supplementary_Figure_4.pdf]

A

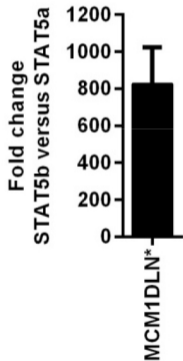

B

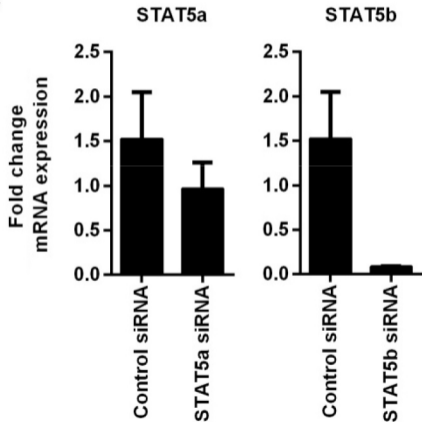

Supplement: NIHMS74400-supplement-Supplementary_Figure_5.pdf [file NIHMS74400-supplement-Supplementary_Figure_5.pdf]
